# Supplementary material
Source: HighWire-hosted journal article supplement (https://openres.ersjournals.com/content/7/3/00242-2021)
Supplement: inline-supplementary-material-2 [file inline-supplementary-material-2.pdf]

Date:       |\_|\_|\_|·|\_|\_|\_|·|\_|\_|\_|\_|\_|\_|  
                                           t  t          m  m          j  j  j  j

 Please select for each question (by marking with **(x)**) only **one** possibility.

|          |                                                                     |                                 |                       |                       |                       |                            |
|----------|---------------------------------------------------------------------|---------------------------------|-----------------------|-----------------------|-----------------------|----------------------------|
| <b>1</b> | Which measure have you taken due to the spread of the Corona-Virus? |                                 |                       |                       |                       |                            |
|          |                                                                     | <b>1<br/>Does not<br/>apply</b> | <b>2</b>              | <b>3</b>              | <b>4</b>              | <b>5<br/>Fully applies</b> |
| a        | Increased handwashing                                               | <input type="radio"/>           | <input type="radio"/> | <input type="radio"/> | <input type="radio"/> | <input type="radio"/>      |
| b        | Regular hand disinfection                                           | <input type="radio"/>           | <input type="radio"/> | <input type="radio"/> | <input type="radio"/> | <input type="radio"/>      |
| c        | Wearing face mask in the public space                               | <input type="radio"/>           | <input type="radio"/> | <input type="radio"/> | <input type="radio"/> | <input type="radio"/>      |
| d        | Purchase of clinical thermometer or oxygen saturation device        | <input type="radio"/>           | <input type="radio"/> | <input type="radio"/> | <input type="radio"/> | <input type="radio"/>      |
| e        | Accumulate food stocks                                              | <input type="radio"/>           | <input type="radio"/> | <input type="radio"/> | <input type="radio"/> | <input type="radio"/>      |
| f        | Forego travel                                                       | <input type="radio"/>           | <input type="radio"/> | <input type="radio"/> | <input type="radio"/> | <input type="radio"/>      |
| g        | Social distancing in daily life                                     | <input type="radio"/>           | <input type="radio"/> | <input type="radio"/> | <input type="radio"/> | <input type="radio"/>      |
| h        | Avoid contacts with doctors                                         | <input type="radio"/>           | <input type="radio"/> | <input type="radio"/> | <input type="radio"/> | <input type="radio"/>      |
| i        | Avoid physiotherapy                                                 | <input type="radio"/>           | <input type="radio"/> | <input type="radio"/> | <input type="radio"/> | <input type="radio"/>      |
| j        | Avoid breathing therapy                                             | <input type="radio"/>           | <input type="radio"/> | <input type="radio"/> | <input type="radio"/> | <input type="radio"/>      |
| k        | Avoid lung sports                                                   | <input type="radio"/>           | <input type="radio"/> | <input type="radio"/> | <input type="radio"/> | <input type="radio"/>      |
|          | <i>Further measures that you have taken? (please insert)</i>        |                                 |                       |                       |                       |                            |
| l        | Measure 1                                                           |                                 |                       |                       |                       |                            |
| m        | Measure 2                                                           |                                 |                       |                       |                       |                            |
| n        | Measure 3                                                           |                                 |                       |                       |                       |                            |

| Please select for each question (by marking with (x)) only <b>one</b> possibility. |                                                                                     |                               |                       |                       |                       |                           |
|------------------------------------------------------------------------------------|-------------------------------------------------------------------------------------|-------------------------------|-----------------------|-----------------------|-----------------------|---------------------------|
| <b>2</b>                                                                           | How did you inform yourself on protective measures against Corona virus?            |                               |                       |                       |                       |                           |
|                                                                                    |                                                                                     | <b>1</b><br>Does not<br>apply | 2                     | 3                     | 4                     | <b>5</b><br>Fully applies |
| a                                                                                  | Through public media<br>(TV, newspapers, internet)                                  | <input type="radio"/>         | <input type="radio"/> | <input type="radio"/> | <input type="radio"/> | <input type="radio"/>     |
| b                                                                                  | At your general practitioner                                                        | <input type="radio"/>         | <input type="radio"/> | <input type="radio"/> | <input type="radio"/> | <input type="radio"/>     |
| c                                                                                  | in the pneumological practice                                                       | <input type="radio"/>         | <input type="radio"/> | <input type="radio"/> | <input type="radio"/> | <input type="radio"/>     |
| d                                                                                  | in the clinic                                                                       | <input type="radio"/>         | <input type="radio"/> | <input type="radio"/> | <input type="radio"/> | <input type="radio"/>     |
| <b>3</b>                                                                           | How do you assess the access to medical treatment during the Corona virus pandemic? |                               |                       |                       |                       |                           |
|                                                                                    |                                                                                     | <b>1</b><br>Does not<br>apply | 2                     | 3                     | 4                     | <b>5</b><br>Fully applies |
| a                                                                                  | My GP was always available                                                          | <input type="radio"/>         | <input type="radio"/> | <input type="radio"/> | <input type="radio"/> | <input type="radio"/>     |
| b                                                                                  | My treating pneumologist was<br>always available                                    | <input type="radio"/>         | <input type="radio"/> | <input type="radio"/> | <input type="radio"/> | <input type="radio"/>     |
| c                                                                                  | I was concerned not to have<br>access to medical treatment in<br>an emergency       | <input type="radio"/>         | <input type="radio"/> | <input type="radio"/> | <input type="radio"/> | <input type="radio"/>     |
| d                                                                                  | I cancelled my scheduled<br>medical visits for COPD due<br>fear of infection        | <input type="radio"/>         | <input type="radio"/> | <input type="radio"/> | <input type="radio"/> | <input type="radio"/>     |
| e                                                                                  | My scheduled medical visits for<br>COPD were cancelled by the<br>practice           | <input type="radio"/>         | <input type="radio"/> | <input type="radio"/> | <input type="radio"/> | <input type="radio"/>     |
| f                                                                                  | I always had access to my<br>inhalative treatment                                   | <input type="radio"/>         | <input type="radio"/> | <input type="radio"/> | <input type="radio"/> | <input type="radio"/>     |
| g                                                                                  | My inhalative therapy was<br>changed                                                | <input type="radio"/>         | <input type="radio"/> | <input type="radio"/> | <input type="radio"/> | <input type="radio"/>     |

|                                                                                            |                                                                                                                                                                                                |                                                                                                               |                       |                       |                       |                       |
|--------------------------------------------------------------------------------------------|------------------------------------------------------------------------------------------------------------------------------------------------------------------------------------------------|---------------------------------------------------------------------------------------------------------------|-----------------------|-----------------------|-----------------------|-----------------------|
| h                                                                                          | Pulmonary care has deteriorated during the COVID-19 pandemic                                                                                                                                   | <input type="radio"/>                                                                                         | <input type="radio"/> | <input type="radio"/> | <input type="radio"/> | <input type="radio"/> |
| Please select for each question (by marking with <b>(x)</b> ) only <b>one</b> possibility. |                                                                                                                                                                                                |                                                                                                               |                       |                       |                       |                       |
| 4                                                                                          | Various university outpatient clinics and practices have switched to telephone- or video consultation for reasons of infection protection. In case you have used it, what was your experience? |                                                                                                               |                       |                       |                       |                       |
|                                                                                            |                                                                                                                                                                                                | 1<br>Does not apply                                                                                           | 2                     | 3                     | 4                     | 5<br>Does apply       |
| a                                                                                          | I liked using the telephone- / video-consultation                                                                                                                                              | <input type="radio"/>                                                                                         | <input type="radio"/> | <input type="radio"/> | <input type="radio"/> | <input type="radio"/> |
| b                                                                                          | A personal contact cannot be replaced by this setup                                                                                                                                            | <input type="radio"/>                                                                                         | <input type="radio"/> | <input type="radio"/> | <input type="radio"/> | <input type="radio"/> |
| c                                                                                          | I felt worse cared for                                                                                                                                                                         | <input type="radio"/>                                                                                         | <input type="radio"/> | <input type="radio"/> | <input type="radio"/> | <input type="radio"/> |
| d                                                                                          | I had difficulties to sufficiently describe my health state by telephone or video                                                                                                              | <input type="radio"/>                                                                                         | <input type="radio"/> | <input type="radio"/> | <input type="radio"/> | <input type="radio"/> |
| e                                                                                          | The physician was able to get a sufficient picture of my condition                                                                                                                             | <input type="radio"/>                                                                                         | <input type="radio"/> | <input type="radio"/> | <input type="radio"/> | <input type="radio"/> |
| f                                                                                          | I did not use the telephone or video consultation                                                                                                                                              | <input type="radio"/>                                                                                         | <input type="radio"/> | <input type="radio"/> | <input type="radio"/> | <input type="radio"/> |
| How do you assess the course of disease of your COPD during the pandemic?                  |                                                                                                                                                                                                |                                                                                                               |                       |                       |                       |                       |
| 5                                                                                          | My health state                                                                                                                                                                                | <input type="radio"/> was stable<br><input type="radio"/> has worsened<br><input type="radio"/> had increased |                       |                       |                       |                       |
| Please select for each question (by marking with <b>(x)</b> ) only <b>one</b> possibility. |                                                                                                                                                                                                |                                                                                                               |                       |                       |                       |                       |
|                                                                                            |                                                                                                                                                                                                | 1<br>Does not apply                                                                                           | 2                     | 3                     | 4                     | 5<br>Fully applies    |
| 6                                                                                          | I had shortness of breath                                                                                                                                                                      | <input type="radio"/>                                                                                         | <input type="radio"/> | <input type="radio"/> | <input type="radio"/> | <input type="radio"/> |

|   |                                                                      |                       |                       |                       |                       |                       |
|---|----------------------------------------------------------------------|-----------------------|-----------------------|-----------------------|-----------------------|-----------------------|
| 7 | I had increased cough and sputum                                     | <input type="radio"/> |
| 8 | I repeatedly had acute worsenings of my health state (exacerbations) | <input type="radio"/> |

| Please select for each question (by marking with (x)) only <b>one</b> possibility. |                                                                           |                                                                                                                  |                       |                       |                          |                       |
|------------------------------------------------------------------------------------|---------------------------------------------------------------------------|------------------------------------------------------------------------------------------------------------------|-----------------------|-----------------------|--------------------------|-----------------------|
| How did the pandemic influence your physical activity?                             |                                                                           |                                                                                                                  |                       |                       |                          |                       |
|                                                                                    |                                                                           | 1<br>Does not<br>apply                                                                                           | 2                     | 3                     | 4                        | 5<br>Fully apply      |
| 9                                                                                  | Due to the curfew, I am not as active                                     | <input type="radio"/>                                                                                            | <input type="radio"/> | <input type="radio"/> | <input type="radio"/>    | <input type="radio"/> |
| 10                                                                                 | The lack of physiotherapeutic treatment negatively impacts on my activity | <input type="radio"/>                                                                                            | <input type="radio"/> | <input type="radio"/> | <input type="radio"/>    | <input type="radio"/> |
| 11                                                                                 | Due to fear of infection I go for a walk on fewer occasions               | <input type="radio"/>                                                                                            | <input type="radio"/> | <input type="radio"/> | <input type="radio"/>    | <input type="radio"/> |
| 12                                                                                 | My physical resilience                                                    | <input type="radio"/> Is unchanged<br><input type="radio"/> has decreased<br><input type="radio"/> has increased |                       |                       |                          |                       |
| Are you are have you been infected with COVID-19?                                  |                                                                           |                                                                                                                  |                       |                       |                          |                       |
| 13                                                                                 | I am infected with COVID-19                                               | <input type="radio"/> yes                                                                                        |                       |                       | <input type="radio"/> no |                       |
| 14                                                                                 | I was infected with COVID-19                                              | <input type="radio"/> yes                                                                                        |                       |                       | <input type="radio"/> no |                       |
| <b>If you have been infected with COVID-19</b>                                     |                                                                           |                                                                                                                  |                       |                       |                          |                       |
| <i>How was COVID-19 diagnosed?</i>                                                 |                                                                           |                                                                                                                  |                       |                       |                          |                       |
| 15                                                                                 | Did you diagnose it yourself based on symptoms?                           | <input type="radio"/> yes                                                                                        |                       |                       | <input type="radio"/> no |                       |
| 16                                                                                 | Was it a doctor diagnosis?                                                | <input type="radio"/> yes                                                                                        |                       |                       | <input type="radio"/> no |                       |
| 17                                                                                 | Was a virus detection performed?                                          | <input type="radio"/> yes                                                                                        |                       |                       | <input type="radio"/> no |                       |
| 18                                                                                 | A rapid test was performed                                                | <input type="radio"/> yes                                                                                        |                       |                       | <input type="radio"/> no |                       |
| 19                                                                                 | A so called PCR was performed                                             | <input type="radio"/> yes                                                                                        |                       |                       | <input type="radio"/> no |                       |
| 20                                                                                 | I do not know which test was performed                                    | <input type="radio"/> yes                                                                                        |                       |                       | <input type="radio"/> no |                       |
| <i>How was your course of disease?</i>                                             |                                                                           |                                                                                                                  |                       |                       |                          |                       |
| 21                                                                                 | I had mild symptoms and was able to cure at home.                         | <input type="radio"/> yes                                                                                        |                       |                       | <input type="radio"/> no |                       |
| 22                                                                                 | I had to see a doctor but could stay at home                              | <input type="radio"/> yes                                                                                        |                       |                       | <input type="radio"/> no |                       |
| 23                                                                                 | I had to be treated in the clinic (normal ward)                           | <input type="radio"/> yes                                                                                        |                       |                       | <input type="radio"/> no |                       |

|\_|\_|\_|-|\_|\_|\_|-|\_|\_|\_|

11

Pseudonym (wird im Studienzentrum eingegeben)

Seite 6 von

| If you have been infected with COVID-19                                            |                                                                       |                           |                          |                       |                       |                       |
|------------------------------------------------------------------------------------|-----------------------------------------------------------------------|---------------------------|--------------------------|-----------------------|-----------------------|-----------------------|
| How was your course of disease                                                     |                                                                       |                           |                          |                       |                       |                       |
| 24                                                                                 | I had to be treated in the intensive care unit in a clinic            | <input type="radio"/> yes | <input type="radio"/> no |                       |                       |                       |
| 25                                                                                 | I received cortisone in the form of tablets or infusions              | <input type="radio"/> yes | <input type="radio"/> no |                       |                       |                       |
| 26                                                                                 | I temporarily received oxygen                                         | <input type="radio"/> yes | <input type="radio"/> no |                       |                       |                       |
| 27                                                                                 | I had to be ventilated with a mask                                    | <input type="radio"/> yes | <input type="radio"/> no |                       |                       |                       |
| 28                                                                                 | I had to be ventilated with a ventilator                              | <input type="radio"/> yes | <input type="radio"/> no |                       |                       |                       |
| 29                                                                                 | I receive a long-term oxygen therapy                                  | <input type="radio"/> yes | <input type="radio"/> no |                       |                       |                       |
| 30                                                                                 | My demand of oxygen has increased                                     | <input type="radio"/> yes | <input type="radio"/> no |                       |                       |                       |
| 31                                                                                 | Since the infection, I need a long-term oxygen therapy                | <input type="radio"/> yes | <input type="radio"/> no |                       |                       |                       |
| 32                                                                                 | I received a follow-up treatment                                      | <input type="radio"/> yes | <input type="radio"/> no |                       |                       |                       |
| Please select for each question (by marking with (x)) only <b>one</b> possibility. |                                                                       |                           |                          |                       |                       |                       |
| 33                                                                                 | If you have been infected with COVID-19, which symptoms did you have? |                           |                          |                       |                       |                       |
|                                                                                    |                                                                       | 1<br>Does not<br>apply    | 2                        | 3                     | 4                     | 5<br>Fully<br>applies |
| a                                                                                  | Cough                                                                 | <input type="radio"/>     | <input type="radio"/>    | <input type="radio"/> | <input type="radio"/> | <input type="radio"/> |
| b                                                                                  | Fever                                                                 | <input type="radio"/>     | <input type="radio"/>    | <input type="radio"/> | <input type="radio"/> | <input type="radio"/> |
| c                                                                                  | Sputum                                                                | <input type="radio"/>     | <input type="radio"/>    | <input type="radio"/> | <input type="radio"/> | <input type="radio"/> |
| d                                                                                  | Shortness of breath                                                   | <input type="radio"/>     | <input type="radio"/>    | <input type="radio"/> | <input type="radio"/> | <input type="radio"/> |
| e                                                                                  | Fatigue                                                               | <input type="radio"/>     | <input type="radio"/>    | <input type="radio"/> | <input type="radio"/> | <input type="radio"/> |
| f                                                                                  | Muscular pain                                                         | <input type="radio"/>     | <input type="radio"/>    | <input type="radio"/> | <input type="radio"/> | <input type="radio"/> |
| g                                                                                  | Taste disorders                                                       | <input type="radio"/>     | <input type="radio"/>    | <input type="radio"/> | <input type="radio"/> | <input type="radio"/> |
| h                                                                                  | Olfactory impairments                                                 | <input type="radio"/>     | <input type="radio"/>    | <input type="radio"/> | <input type="radio"/> | <input type="radio"/> |
| i                                                                                  | Diarrhea                                                              | <input type="radio"/>     | <input type="radio"/>    | <input type="radio"/> | <input type="radio"/> | <input type="radio"/> |

Pseudonym (wird im Studienzentrum eingegeben)

|                                                                                                                     |                                                                       |                        |                       |                           |                          |                       |
|---------------------------------------------------------------------------------------------------------------------|-----------------------------------------------------------------------|------------------------|-----------------------|---------------------------|--------------------------|-----------------------|
| If you have been infected with COVID-19, which symptoms did you have?                                               |                                                                       |                        |                       |                           |                          |                       |
| <b>33</b>                                                                                                           | If you have been infected with COVID-19, which symptoms did you have? |                        |                       |                           |                          |                       |
|                                                                                                                     |                                                                       | 1<br>Does not<br>apply | 2                     | 3                         | 4                        | 5<br>Fully<br>applies |
| j                                                                                                                   | Chest pain                                                            | <input type="radio"/>  | <input type="radio"/> | <input type="radio"/>     | <input type="radio"/>    | <input type="radio"/> |
| k                                                                                                                   | Pressure on the chest                                                 | <input type="radio"/>  | <input type="radio"/> | <input type="radio"/>     | <input type="radio"/>    | <input type="radio"/> |
| l                                                                                                                   | Disturbances of consciousness                                         | <input type="radio"/>  | <input type="radio"/> | <input type="radio"/>     | <input type="radio"/>    | <input type="radio"/> |
| <b>Bitte geben Sie als Freitext Ihre Medikamente (<u>alle</u> Medikamente, d.h. Tabletten und Inhalationen) an.</b> |                                                                       |                        |                       |                           |                          |                       |
| <b>34</b>                                                                                                           | Has your existing therapy been changed due to COVID-19 disease        |                        |                       | <input type="radio"/> yes | <input type="radio"/> no |                       |
| <b>35</b>                                                                                                           | Treatment before COVID-19 infection                                   |                        |                       |                           |                          |                       |
| a                                                                                                                   |                                                                       |                        |                       |                           |                          |                       |
| b                                                                                                                   |                                                                       |                        |                       |                           |                          |                       |
| c                                                                                                                   |                                                                       |                        |                       |                           |                          |                       |
| d                                                                                                                   |                                                                       |                        |                       |                           |                          |                       |
| e                                                                                                                   |                                                                       |                        |                       |                           |                          |                       |
| <b>36</b>                                                                                                           | Treatment during COVID-19 infection                                   |                        |                       |                           |                          |                       |
| a                                                                                                                   |                                                                       |                        |                       |                           |                          |                       |
| b                                                                                                                   |                                                                       |                        |                       |                           |                          |                       |
| c                                                                                                                   |                                                                       |                        |                       |                           |                          |                       |
| <b>37</b>                                                                                                           | Treatment after COVID-19 infection                                    |                        |                       |                           |                          |                       |
| a                                                                                                                   |                                                                       |                        |                       |                           |                          |                       |
| b                                                                                                                   |                                                                       |                        |                       |                           |                          |                       |
| c                                                                                                                   |                                                                       |                        |                       |                           |                          |                       |
| d                                                                                                                   |                                                                       |                        |                       |                           |                          |                       |



**For each of the following statements, please indicate which best applies to you at this time.**

Please select for each question (by marking with (x)) only one possibility

**38** How is your COPD? Take the COPD Assessment Test™ (CAT)

- |   |                                                                    |   |   |   |   |   |                                                                           |
|---|--------------------------------------------------------------------|---|---|---|---|---|---------------------------------------------------------------------------|
| a | I never cough                                                      | ① | ② | ③ | ④ | ⑤ | I cough all the time                                                      |
| b | I have no phlegm (mucus) on my chest at all                        | ① | ② | ③ | ④ | ⑤ | My chest is full of phlegm (mucus)                                        |
| c | My chest does not feel tight at all                                | ① | ② | ③ | ④ | ⑤ | My chest feels very tight                                                 |
| d | When I walk up a hill or a flight of stairs I am not out of breath | ① | ② | ③ | ④ | ⑤ | When I walk up a hill or a flight of stairs I am completely out of breath |
| e | I am not limited to doing any activities at home                   | ① | ② | ③ | ④ | ⑤ | I am completely limited to doing all activities at home                   |
| f | I am confident leaving my home despite my lung condition           | ① | ② | ③ | ④ | ⑤ | I am not confident leaving my home at all because of my lung condition    |
| g | I sleep soundly                                                    | ① | ② | ③ | ④ | ⑤ | I do not sleep soundly because of my lung condition                       |
| h | I have lots of energy                                              | ① | ② | ③ | ④ | ⑤ | I have no energy at all                                                   |

|           |                                                                                                                                                                             |                       |                       |                       |                       |
|-----------|-----------------------------------------------------------------------------------------------------------------------------------------------------------------------------|-----------------------|-----------------------|-----------------------|-----------------------|
|           | Please select for each line (by marking with (x)) only one possibility                                                                                                      |                       |                       |                       |                       |
| <b>39</b> | Over the last 2 weeks, how often have you been bothered by any of the following problems?                                                                                   |                       |                       |                       |                       |
|           |                                                                                                                                                                             | Not at all            | Several days          | More than half days   | Nearly every day      |
| a         | Little interest or pleasure in doing things                                                                                                                                 | <input type="radio"/> | <input type="radio"/> | <input type="radio"/> | <input type="radio"/> |
| b         | Feeling down, depressed, or hopeless                                                                                                                                        | <input type="radio"/> | <input type="radio"/> | <input type="radio"/> | <input type="radio"/> |
| c         | Trouble falling or staying asleep, or sleeping too much                                                                                                                     | <input type="radio"/> | <input type="radio"/> | <input type="radio"/> | <input type="radio"/> |
| d         | Feeling tired or having little energy                                                                                                                                       | <input type="radio"/> | <input type="radio"/> | <input type="radio"/> | <input type="radio"/> |
| e         | Poor appetite or overeating                                                                                                                                                 | <input type="radio"/> | <input type="radio"/> | <input type="radio"/> | <input type="radio"/> |
| f         | Feeling bad about yourself – or that you are a failure or have let yourself or your family down                                                                             | <input type="radio"/> | <input type="radio"/> | <input type="radio"/> | <input type="radio"/> |
| g         | Trouble concentrating on things, such as reading the newspaper or watching television                                                                                       | <input type="radio"/> | <input type="radio"/> | <input type="radio"/> | <input type="radio"/> |
| h         | Moving or speaking so slowly that other people could have noticed?<br>Or the opposite – being so fidgety or restless that you have been moving around a lot more than usual | <input type="radio"/> | <input type="radio"/> | <input type="radio"/> | <input type="radio"/> |
| i         | Thoughts that you would be better off dead or of hurting yourself in some way                                                                                               | <input type="radio"/> | <input type="radio"/> | <input type="radio"/> | <input type="radio"/> |

Please tick **(x)** only **one** answer for this question.

**40** How badly do you suffer from shortness of breath (MRC scale)?

- ☐ I only get breathless with strenuous exercise
- ☐ I get short of breath when hurrying on the level or walking up a slight hill
- ☐ I walk slower than people of the same age on the level because of breathlessness or have to stop for breath when walking at my own pace on the level
- ☐ I stop for breath after walking about 100 yards or after a few minutes on the level
- ☐ I am too breathless to leave the house or I am breathless when dressing

**Thank you for your cooperation!**
